# Supplementary material for: The interplay of secondary Hg⋯S, Hg⋯N and Hg⋯π bonding interactions in supramolecular structures of phenylmercury(ii) dithiocarbamates
Source: Royal Society of Chemistry journal article supplement (doi:10.1039/c1ce05678f), 2011-01-01
Supplement: c1ce05678f.pdf [file c1ce05678f.pdf]

# SUPPLEMENTARY INFORMATIONS

## The interplay of secondary Hg $\cdots$ S, Hg $\cdots$ N and Hg $\cdots$ $\pi$ bonding interactions in supramolecular structures of phenylmercury(II) dithiocarbamates

Vikram Singh,<sup>†</sup> Abhinav Kumar,<sup>‡</sup> Rajendra Prasad,<sup>§</sup> Gunjan Rajput,<sup>†</sup> M. G. B. Drew,<sup>±</sup> and Nanhai Singh,<sup>\*,†</sup>

<sup>†</sup> *Department of Chemistry, Faculty of Science, Banaras Hindu University, Varanasi-221005, India*

<sup>‡</sup> *Department of Chemistry, Faculty of Science, Lucknow University, Lucknow-226007, India*

<sup>§</sup> *Department of Chemistry, S. G. B. Amravati University, Amravati-444602, India*

<sup>±</sup> *Department of Chemistry, University of Reading, Whiteknights, Reading, RG6 6AD, UK.*

nsinghbhu@gmail.com

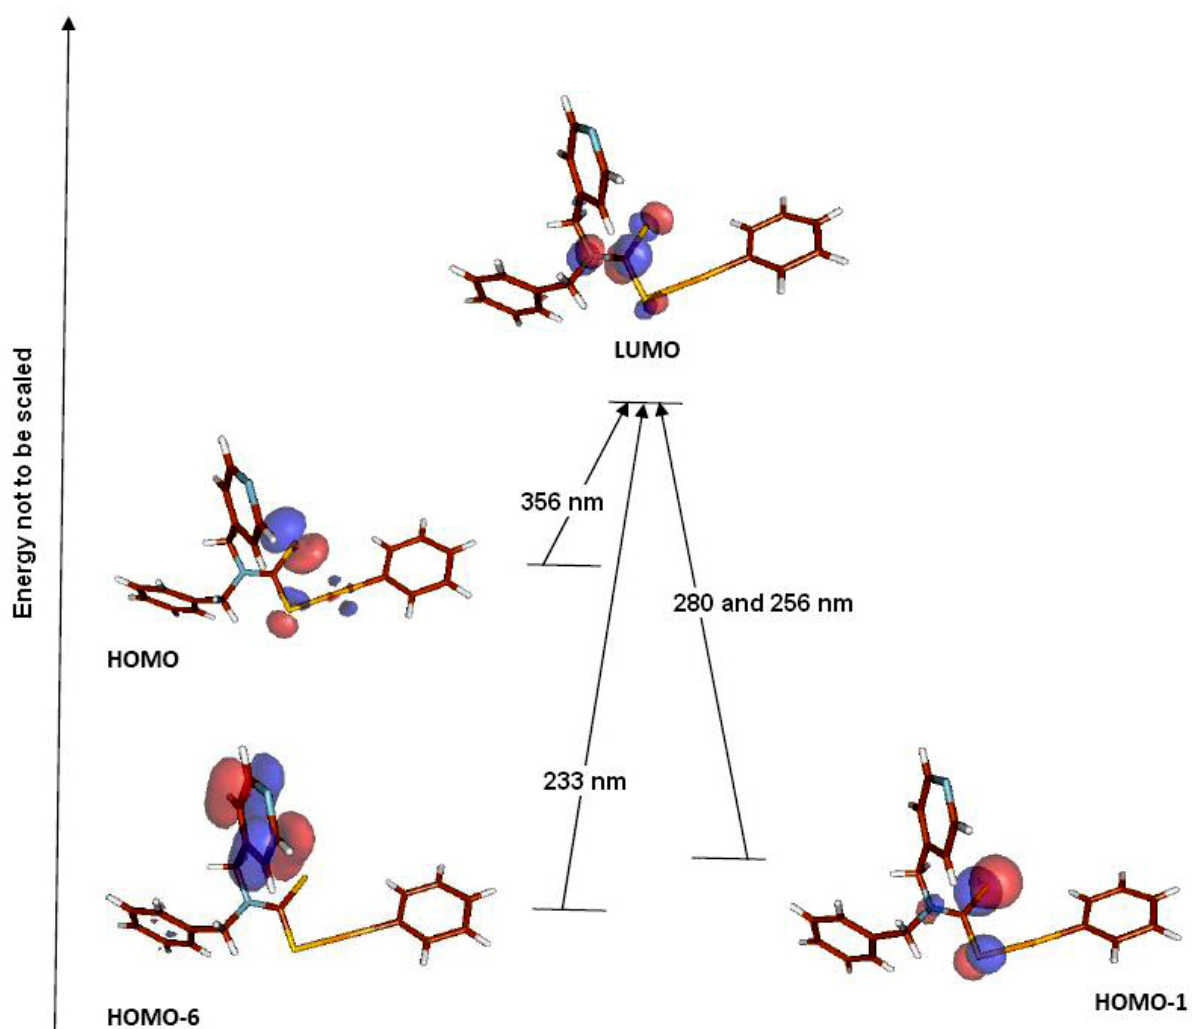

**Fig. S1** Selected orbital transitions for complex **1** (orbital contour value 0.05).

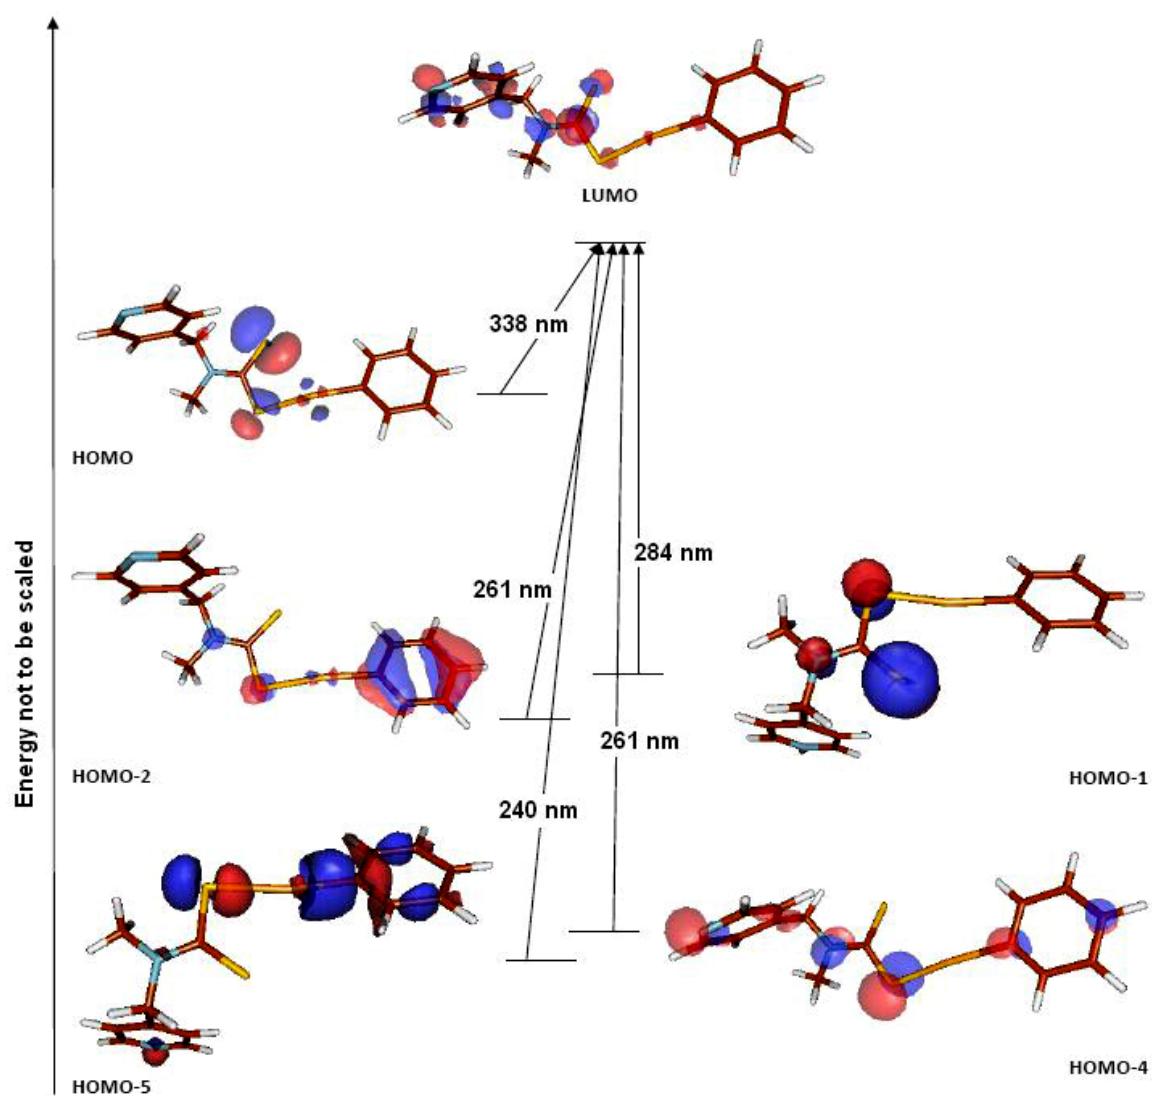

Fig. S2 Selected orbital transitions for 2 (orbital contour value 0.05).

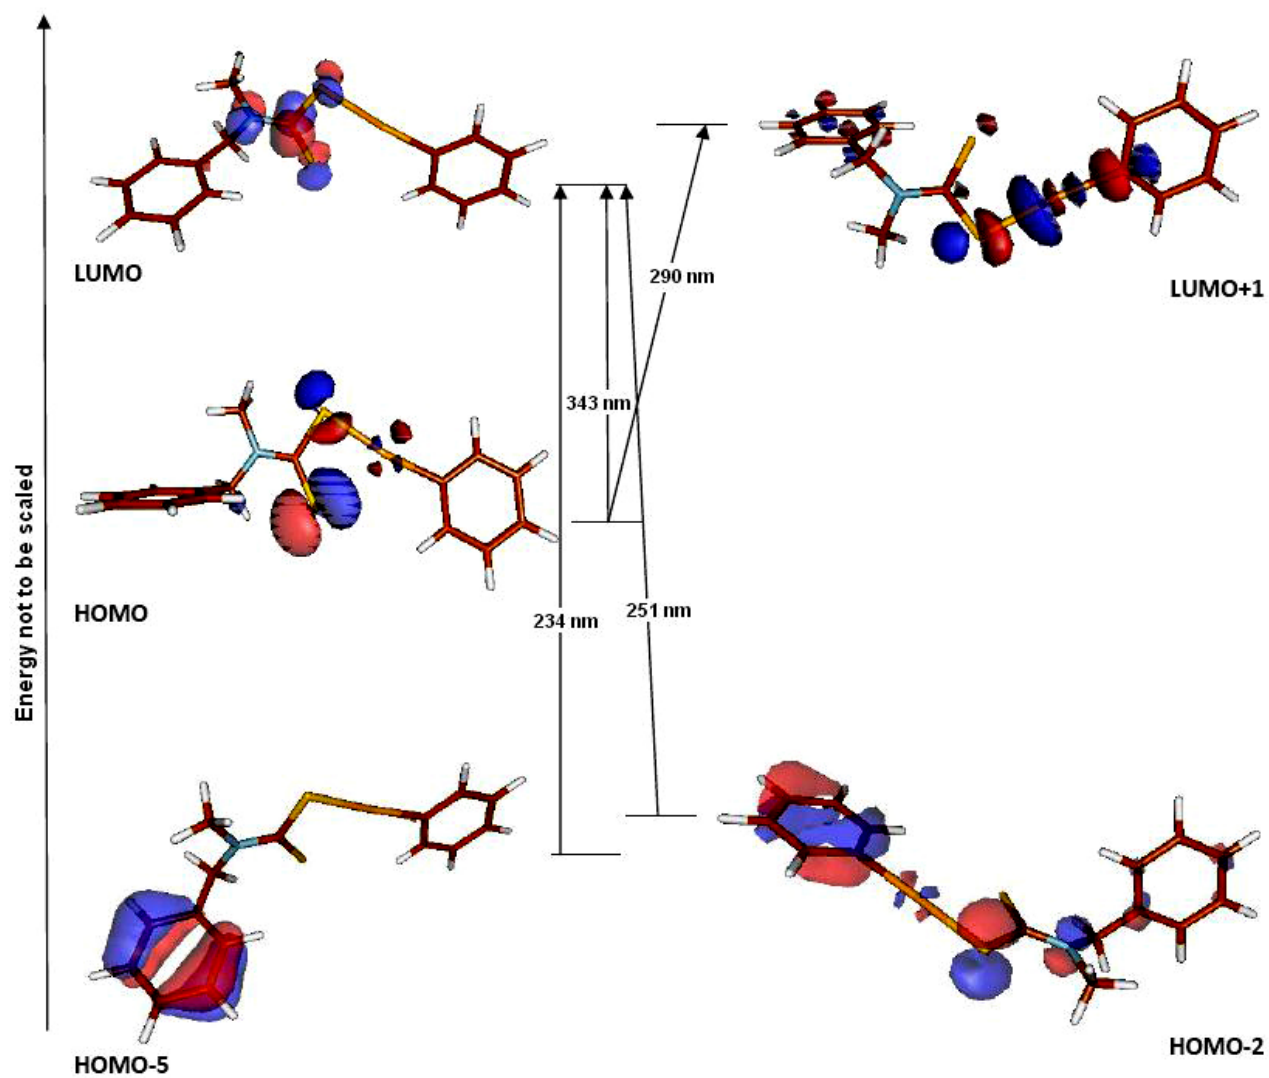

**Fig. S3** Selected orbital transitions for complex 3 (orbital contour value 0.05).
